# Supplementary material for: Gut butyrate-producers confer post-infarction cardiac protection
Source: PubMed Central journal article supplement (PMC10636175; doi:10.1038/s41467-023-43167-5), 2023-11-09
Supplement: 41467_2023_43167_MOESM1_ESM.pdf [file 41467_2023_43167_MOESM1_ESM.pdf]

Supplemental Information for  
**Gut butyrate-producers confer post-infarction cardiac protection**

Hung-Chih Chen *et al.*

Corresponding author: Patrick C.H. Hsieh, [phsieh@ibms.sinica.edu.tw](mailto:phsieh@ibms.sinica.edu.tw)

**This PDF file includes:**

Supplemental Tables 1 to 6

Supplemental Figures 1 to 12

| <b>Characteristic</b>                 | <b>No. (%)</b>             |                             |                           | <b>P Value</b> |
|---------------------------------------|----------------------------|-----------------------------|---------------------------|----------------|
|                                       | <b>Total<br/>(n = 147)</b> | <b>Control<br/>(n = 70)</b> | <b>STEMI<br/>(n = 77)</b> |                |
| Age, mean (SE), y                     | 54.0 (1.0)                 | 52.0 (1.4)                  | 55.7 (1.2)                | 0.052          |
| Male                                  | 115 (78.2)                 | 43 (61.4)                   | 72 (93.5)                 | <0.0001        |
| <b>Location</b>                       |                            |                             |                           |                |
| Northern Taiwan                       | 26 (17.7)                  | 7 (10.0)                    | 19 (24.7)                 |                |
| Middle Taiwan                         | 48 (32.6)                  | 42 (60.0)                   | 6 (7.8)                   |                |
| Southern Taiwan                       | 73 (49.7)                  | 21 (30.0)                   | 42 (54.5)                 |                |
| <b>Comorbidities and risk factors</b> |                            |                             |                           |                |
| Hypertension                          | 46 (31.3)                  | 24(34.3)                    | 23 (29.9)                 | 0.57           |
| Hyperlipidemia                        | 77 (52.4)                  | 25 (35.7)                   | 52 (67.5)                 | <0.0001        |
| Diabetes                              | 29 (19.7)                  | 14 (20.0)                   | 15 (19.5)                 | 0.94           |
| <b>Presenting characteristics</b>     |                            |                             |                           |                |
| <b>Body mass index</b>                |                            |                             |                           |                |
| Underweight(<18.5)                    | 1 (0.7)                    | 1 (1.4)                     | 0 (0.0)                   |                |
| Normal (18.5 to <25)                  | 48 (32.7)                  | 20 (28.6)                   | 28 (36.4)                 | 0.35           |
| Overweight (25 to 30)                 | 60 (40.8)                  | 23 (32.8)                   | 37 (48.1)                 | 0.15           |
| Obese ( $\geq 30$ )                   | 17 (11.6)                  | 4 (5.7)                     | 13 (16.9)                 | 0.63           |

**Supplementary Table 1. Clinical summary of recruited participants.**

The data were analyzed with two-sided unpaired Student's *t*-test.

| Bacteria                                       | Sequence (5'----3')          |
|------------------------------------------------|------------------------------|
| <i>Anaerotruncus colihominis</i> DSM 17241     | (F) CTAAAACAGAGGGCGGCGAC     |
|                                                | (R) CTTCGGGTGTTACCCGGACTC    |
| <i>Clostridium symbiosum</i> ATCC 14940        | (F) AACTGGAGTGTCGGAGAGGT     |
|                                                | (R) TTCATCGTTTACGGCGTGGA     |
| <i>Coprococcus comes</i> ATCC 27758            | (F) GCGGTGTAATGACGCCTTTT     |
|                                                | (R) AGTCTCTCCAGAGTGCCCAT     |
| <i>Ruminococcus torques</i> ATCC 27756         | (F) CGAGGTGGAGCAAATCCCAA     |
|                                                | (R) ACTGACTTCGGGCGTACTG      |
| <i>Bacteroides caccae</i> ATCC 43185           | (F) ATGGGGAAACCCATACGCC      |
|                                                | (R) CCAGAGTCCTCAGCATGACC     |
| <i>Bacteroides thetaiotaomicron</i> VPI-5482   | (F) GGGCAGTGATCTACGTGTCAAG   |
|                                                | (R) CTGCATCGTACCCAAAATCGTCTG |
| <i>Providencia stuartii</i> ATCC 29914         | (F) TCCCTAGAGGAGTGGCTTCC     |
|                                                | (R) CTCCCGAAGGCACTAAAGCA     |
| <i>Collinsella aerofaciens</i> ATCC 25986      | (F) CTCTCCGGAGGGAAGCGAG      |
|                                                | (R) TGTCTCAGTCCCAATCTGGC     |
| <i>Bifidobacterium adolescentis</i> ATCC 15703 | (F) CCGGTGTAACGGTGGAATGT     |
|                                                | (R) GACACGGAGACCGTGGAATG     |
| <i>Bifidobacterium ruminantium</i>             | (F) TCCTATCAGGTAGTCGGCGG     |
|                                                | (R) GCTTGCTCCCAGTCAAAAGC     |
| <i>Streptococcus parasanguinis</i> ATCC15912   | (F) ATGGGGTGACCATCGAAAA      |
|                                                | (R) GAGTCAAAACCGTTGCGGTC     |
| <i>Streptococcus salivarius</i>                | (F) GTTATGAGCTCAGGCTCGCT     |
|                                                | (R) GCAGCAATTCCGCCTTCTTT     |
| <i>Butyricimonas virosa</i> JCM 15149          | (F) AAGGATGACGAGTCATTCGATGC  |
|                                                | (R) CTTCACTTGTTCCGCCTCCC     |
| <i>Subdoligranulum variabile</i>               | (F) GATCCGGCATCGGATTGAGG     |
|                                                | (R) GTGCAATATCCCCACTGCT      |

**Supplementary Table 2. Primer sets for bacterial validation.**

Mean

|            | 1557 taxa (all taxa) |       |         |         |        |        | 1366 taxa (genus-only) |       |         |         |        |        |
|------------|----------------------|-------|---------|---------|--------|--------|------------------------|-------|---------|---------|--------|--------|
|            | ratio                | raw   | z-score | min-max | maxabs | robust | ratio                  | raw   | z-score | min-max | maxabs | robust |
| training   | 1.000                | 1.000 | 1.000   | 1.000   | 1.000  | 1.000  | 1.000                  | 1.000 | 1.000   | 1.000   | 1.000  | 0.998  |
| validation | 0.873                | 0.892 | 0.895   | 0.902   | 0.899  | 0.897  | 0.877                  | 0.902 | 0.900   | 0.899   | 0.893  | 0.888  |
| test       | 0.851                | 0.863 | 0.856   | 0.850   | 0.857  | 0.882  | 0.864                  | 0.884 | 0.848   | 0.847   | 0.831  | 0.862  |

Standard deviation

|            | 1557 taxa |       |         |         |        |        | 1366 taxa |       |         |         |        |        |
|------------|-----------|-------|---------|---------|--------|--------|-----------|-------|---------|---------|--------|--------|
|            | ratio     | raw   | z-score | min-max | maxabs | robust | ratio     | raw   | z-score | min-max | maxabs | robust |
| training   | 0.000     | 0.000 | 0.000   | 0.000   | 0.000  | 0.000  | 0.000     | 0.000 | 0.000   | 0.000   | 0.000  | 0.006  |
| validation | 0.045     | 0.038 | 0.036   | 0.024   | 0.031  | 0.025  | 0.041     | 0.031 | 0.031   | 0.041   | 0.033  | 0.023  |
| test       | 0.055     | 0.043 | 0.067   | 0.064   | 0.056  | 0.038  | 0.062     | 0.023 | 0.083   | 0.047   | 0.074  | 0.049  |

**Supplementary Table 3. Mean and standard deviation values of training, validation, and test with six major metrics used for machine learning.**

|                           | <b>Accuracy</b> | <b>AUC</b>   | <b>Recall</b> | <b>Precision</b> |
|---------------------------|-----------------|--------------|---------------|------------------|
| w/ calibration            | 0.78 (0.046)    | 0.88 (0.051) | 0.83 (0.076)  | 0.76 (0.083)     |
| w/o calibration           | 0.80 (0.027)    | 0.88 (0.023) | 0.82 (0.068)  | 0.79 (0.066)     |
| p-value of <i>t</i> -test | 0.21            | 0.95         | 0.72          | 0.30             |

**Supplementary Table 4. Mean (standard deviation in parentheses) values of four major metrics and their *t*-test results**

| <b>Paper</b>         | <b>Trait</b>      | <b>Samples</b> | <b>Cases</b> | <b>Controls</b> | <b>Taxa</b> | <b>Level</b> | <b>Method</b> | <b>Accuracy</b> | <b>AUC</b> | <b>Recall</b> | <b>Precision</b> |
|----------------------|-------------------|----------------|--------------|-----------------|-------------|--------------|---------------|-----------------|------------|---------------|------------------|
| Current study        | STEMI             | 144            | 70           | 70              | 1557 ASV    | Genus        | Mixed         | 0.78            | 0.88       | 0.83          | 0.76             |
| Aryal et al., 2020   | CVDs              | 951            | 478          | 473             | 25-500 OTU  | Genus        | RF            | n/a             | 0.70       | 0.69          | n/a              |
| Pasolli et al., 2016 | Liver cirrhosis   | 232            | 118          | 114             | 542         | Species      | SVM           | 0.83            | 0.92       | 0.83          | 0.84             |
|                      | Colorectal Cancer | 121            | 48           | 73              | 503         | Species      | RF            | 0.80            | 0.87       | 0.81          | 0.82             |
|                      | Obesity           | 253            | 164          | 89              | 465         | Species      | RF            | 0.64            | 0.66       | 0.64          | 0.54             |
|                      | IBD               | 110            | 25           | 85              | 443         | Species      | RF            | 0.81            | 0.89       | 0.81          | 0.72             |
|                      | Diabetes          | 96             | 53           | 43              | 381         | Species      | RF            | 0.70            | 0.76       | 0.70          | 0.73             |

**Supplementary Table 5. Comparison of prediction accuracy with published results.**

STEMI, ST-elevation myocardial infarction; CVD, cardiovascular disease; IBD, inflammatory bowel disease; ASV, amplicon sequence variant; OTU, operational taxonomic unit; RF, random forest; SVM, support vector machine.

|                  | Precursor ion<br>Mass (m/z) | Product ion<br>Mass (m/z) | DP (V) | CE (eV) |
|------------------|-----------------------------|---------------------------|--------|---------|
| BHB              | 103.1                       | 59.1                      | -50    | -10     |
| BHB-d4           | 107.1                       | 59.1                      | -50    | -13     |
| C <sub>Sp1</sub> | 103.1                       | 59.0                      | -50    | -10     |
| C <sub>Sp2</sub> | 103.1                       | 59.0                      | -50    | -10     |
| C <sub>Sp3</sub> | 103.1                       | 59.0                      | -50    | -10     |
| C <sub>Bv1</sub> | 103.1                       | 59.0                      | -50    | -10     |
| C <sub>Bv2</sub> | 103.1                       | 59.0                      | -50    | -10     |
| C <sub>Bv3</sub> | 103.1                       | 59.0                      | -50    | -10     |
| C <sub>Ba1</sub> | 103.1                       | 59.0                      | -50    | -10     |
| C <sub>Ba2</sub> | 103.1                       | 59.0                      | -50    | -10     |
| C <sub>Ba3</sub> | 103.1                       | 59.0                      | -50    | -10     |

**Supplementary Table 6. Ion-pair selection for liquid chromatography-tandem mass spectrometry (LC-MS/MS) with multiple reaction monitoring (MRM) mode.** BHB,  $\beta$ -hydroxybutyrate; BHB-d4, Sodium D- $\beta$ -Hydroxybutyrate-d4 as an internal standard; DP: declustering potential; CE, Collision Energy; C<sub>Sp</sub>, conditioned medium of *Streptococcus parasanguinis*; C<sub>Bv</sub>, conditioned medium of *Butiricimonas virosa*; C<sub>Ba</sub>, conditioned medium of *Bifidobacterium adlescentis*.

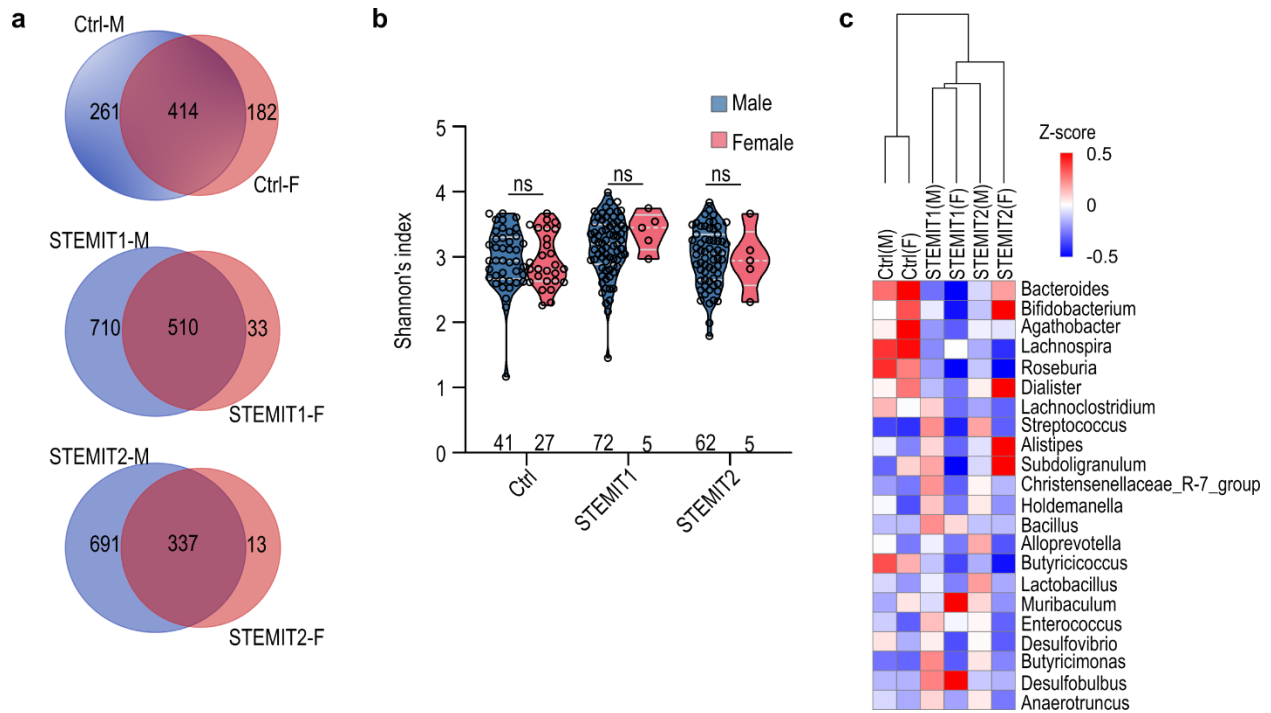

**Supplementary Figure 1. The gender effects on gut microbiota.**

(a) Venn diagram showing overlapping amplicon sequence variants (ASVs) between male (Ctrl-M, STEMIT1-M and STEMIT2-M) and female (Ctrl-F, STEMIT1-F and STEMIT2-F) samples. (b) Shannon's index of Ctrl and STEMI gut microbiota in male and female samples. (c) Differentially abundant bacterial genera in Ctrl and STEMI samples of different genders. The number of biologically independent samples are indicated in each chart. Data in (b) were analyzed with two-way ANOVA and are represented as mean  $\pm$  SEM.



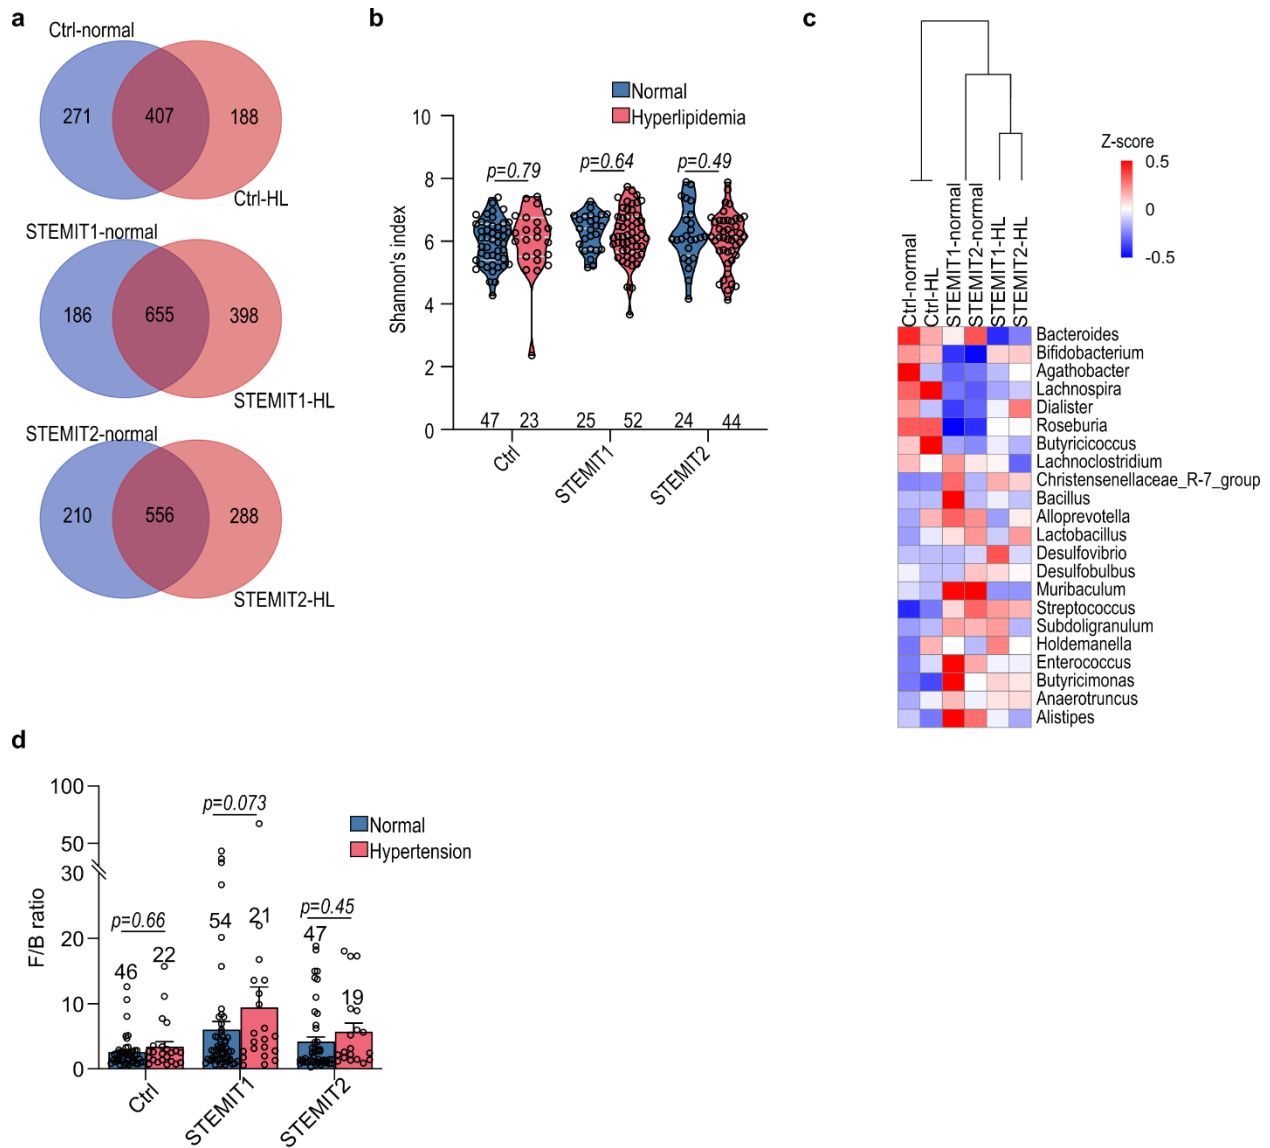

**Supplementary Figure 2. The effects of hyperlipidemia and hypertension on gut microbiota.**

(a) Venn diagram showing overlapping ASVs between normal (Ctrl-normal, STEMIT1-normal and STEMIT2-normal) and hyperlipidemic (Ctrl-HL, STEMIT1-HL and STEMIT2-HL) samples. (b) Shannon's index of Ctrl and STEMI gut microbiota in normal and hyperlipidemic samples. (c) Differentially abundant bacterial genera in Ctrl and STEMI samples with/without hyperlipidemia. (d) The ratio of Firmicutes/Bacteroidetes (F/B ratio) in human Ctrl, STEMIT1 and STEMIT2 stool samples with/without hypertension. The number of biologically independent samples are indicated in each chart. Data in (b, d) were analyzed with two-way ANOVA with FDR correction for six groups and are represented as mean  $\pm$  SEM.

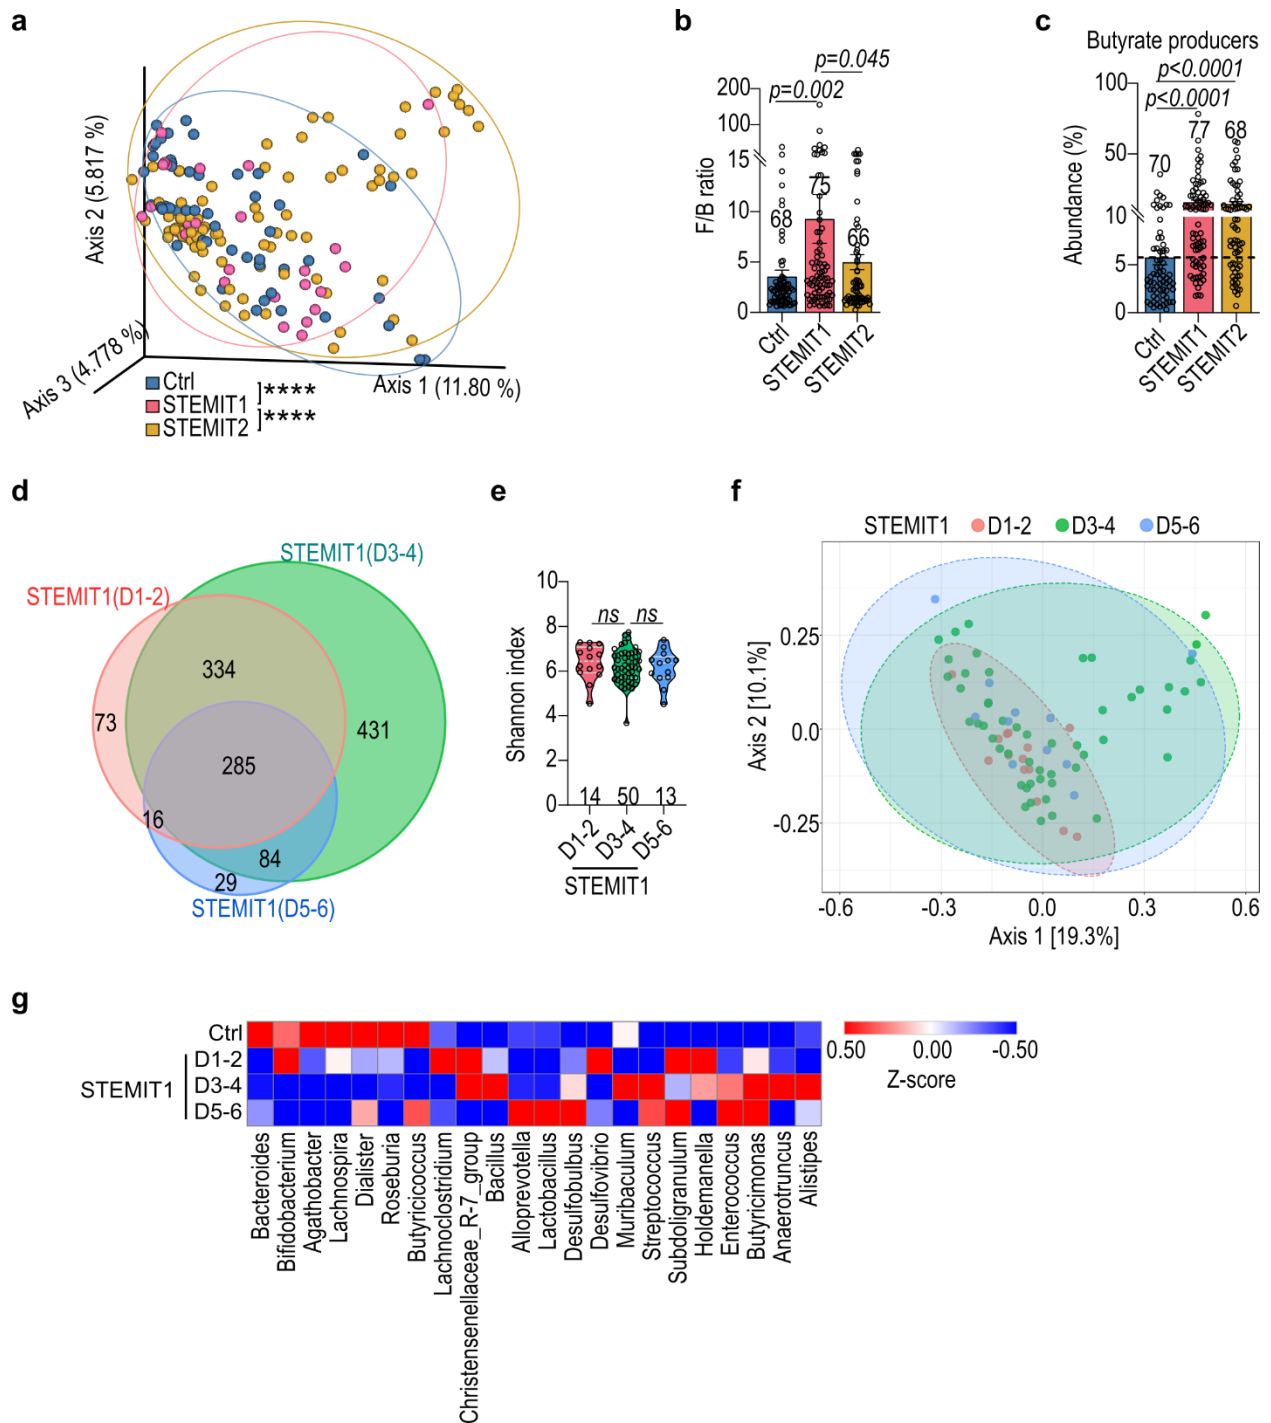

**Supplementary Figure 3. Alteration of gut microbiota in human STEMI samples.**

(a) PCoA of unweighted Unifrac for human Ctrl, STEMIT1 and STEMIT2 gut microbiota. (b) The ratio of Firmicutes/Bacteroidetes in human Ctrl, STEMIT1 and STEMIT2 stool samples (vs. STEMIT1). (c) Relative abundance of butyrate-producers in human Ctrl, STEMIT1 and STEMIT2

samples (vs. Ctrl). **(d)** Venn diagram showing overlapping ASVs of STEMIT1 samples at day 1-2 (D1-2), day 3-4 (D3-4) and day 5-6 (D5-6). **(e)** The Shannon's index of STEMIT1 samples at D1-2, D3-4 and D5-6. **(f)** PCoA of STEMIT1 ASVs at different time points. **(g)** Differential bacterial abundance in STEMIT1 samples at different time points. The number of biologically independent samples are indicated in each chart. Data were analyzed with the Kruskal-Wallis test followed by Dunn's correction. Data are represented as mean  $\pm$  SEM. ns, not significant; \*\*\*\* p <0.0001.

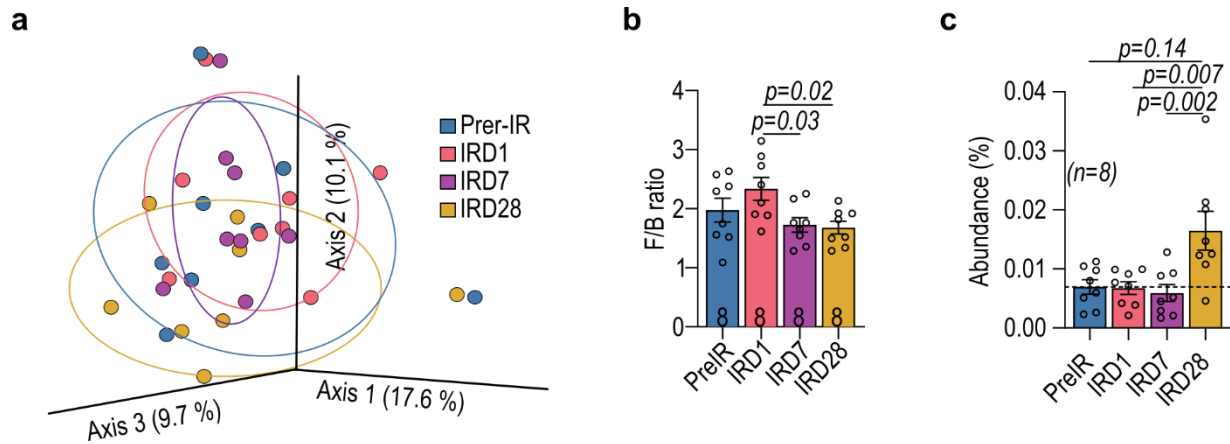

**Supplementary Figure 4. Gut microbiota alteration in the nonhuman primate cardiac ischemia/reperfusion (IR) model.**

(a) PCoA of unweighted Unifrac for nonhuman primate gut microbiota at pre-IR, IRD1, IRD7 and IRD28. (b) The ratio of Firmicutes/Bacteroidetes in nonhuman primate cardiac IR model at basal (pre-IR), IRD1, IRD7 and IRD28. (c) The abundance of butyrate-producing bacteria. The number of biologically independent animals are indicated in each chart. Data in (b, c) were analyzed with Kruskal-Wallis test and corrected with FDR. Data are represented as mean ± SEM.

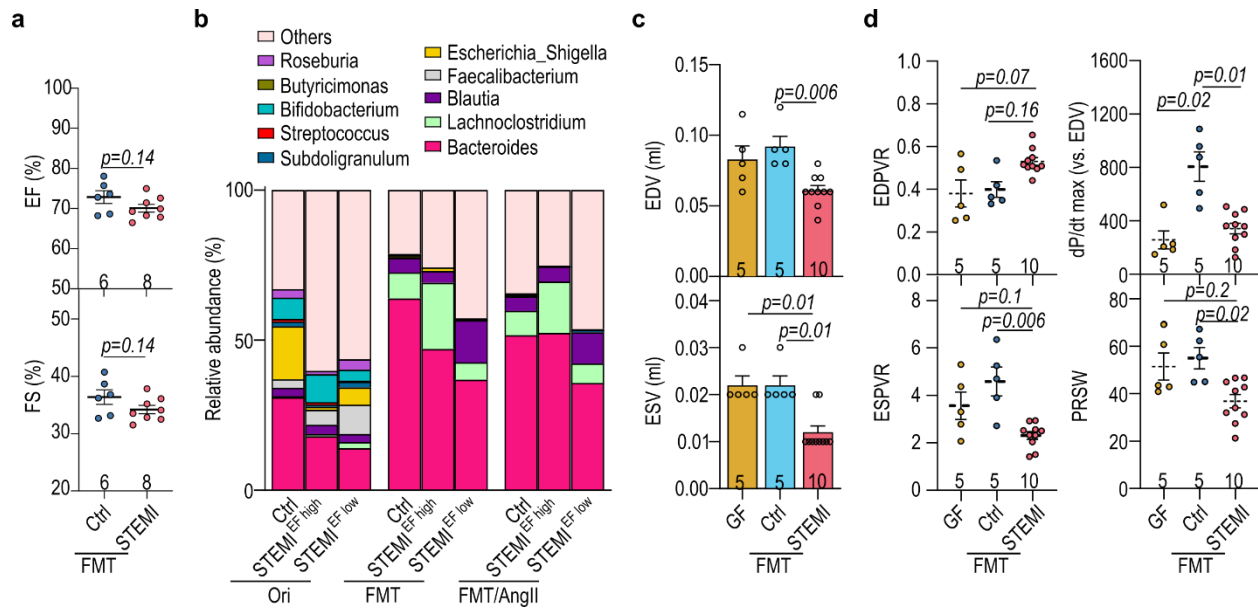

**Supplementary Figure 5. The impact of human fecal transplantation on the post-injury cardiac function of germ-free mice.**

(a) Left ventricular ejection fraction (EF) and fraction shortening (FS) of germ-free (GF) mice receiving control or STEMI fecal microbiome transplantation (FMT) before left anterior descending artery (LAD) ligation. (b) Microbiome composition of original human fecal samples (Ori), stool from GF mice with FMT and FMT-GF mice after angiotensin-II challenge (FMT/AngII). (c) Changes of left ventricular end-diastolic volume (EDV) and end-systolic volume (ESV) of FMT-GF mice on day 14 after AngII challenge. (d) Cardiac catheterization parameters of FMT mice on day 14 after AngII challenge, including end-systolic pressure volume relationship (ESPVR), end-diastolic pressure volume relationship (EDPVR), preload recruitable stroke work (PRSW) and ratio of maximal left ventricular pressure rise (dP/dtmax) to end-diastolic volume (EDV). The number of biologically independent animals are indicated in each chart. Data in (a) were analyzed with two-sided Student's *t*-test; data in (c, d) were analyzed with Kruskal-Wallis test followed by Dunn's correction. Data are represented as mean ± SEM.

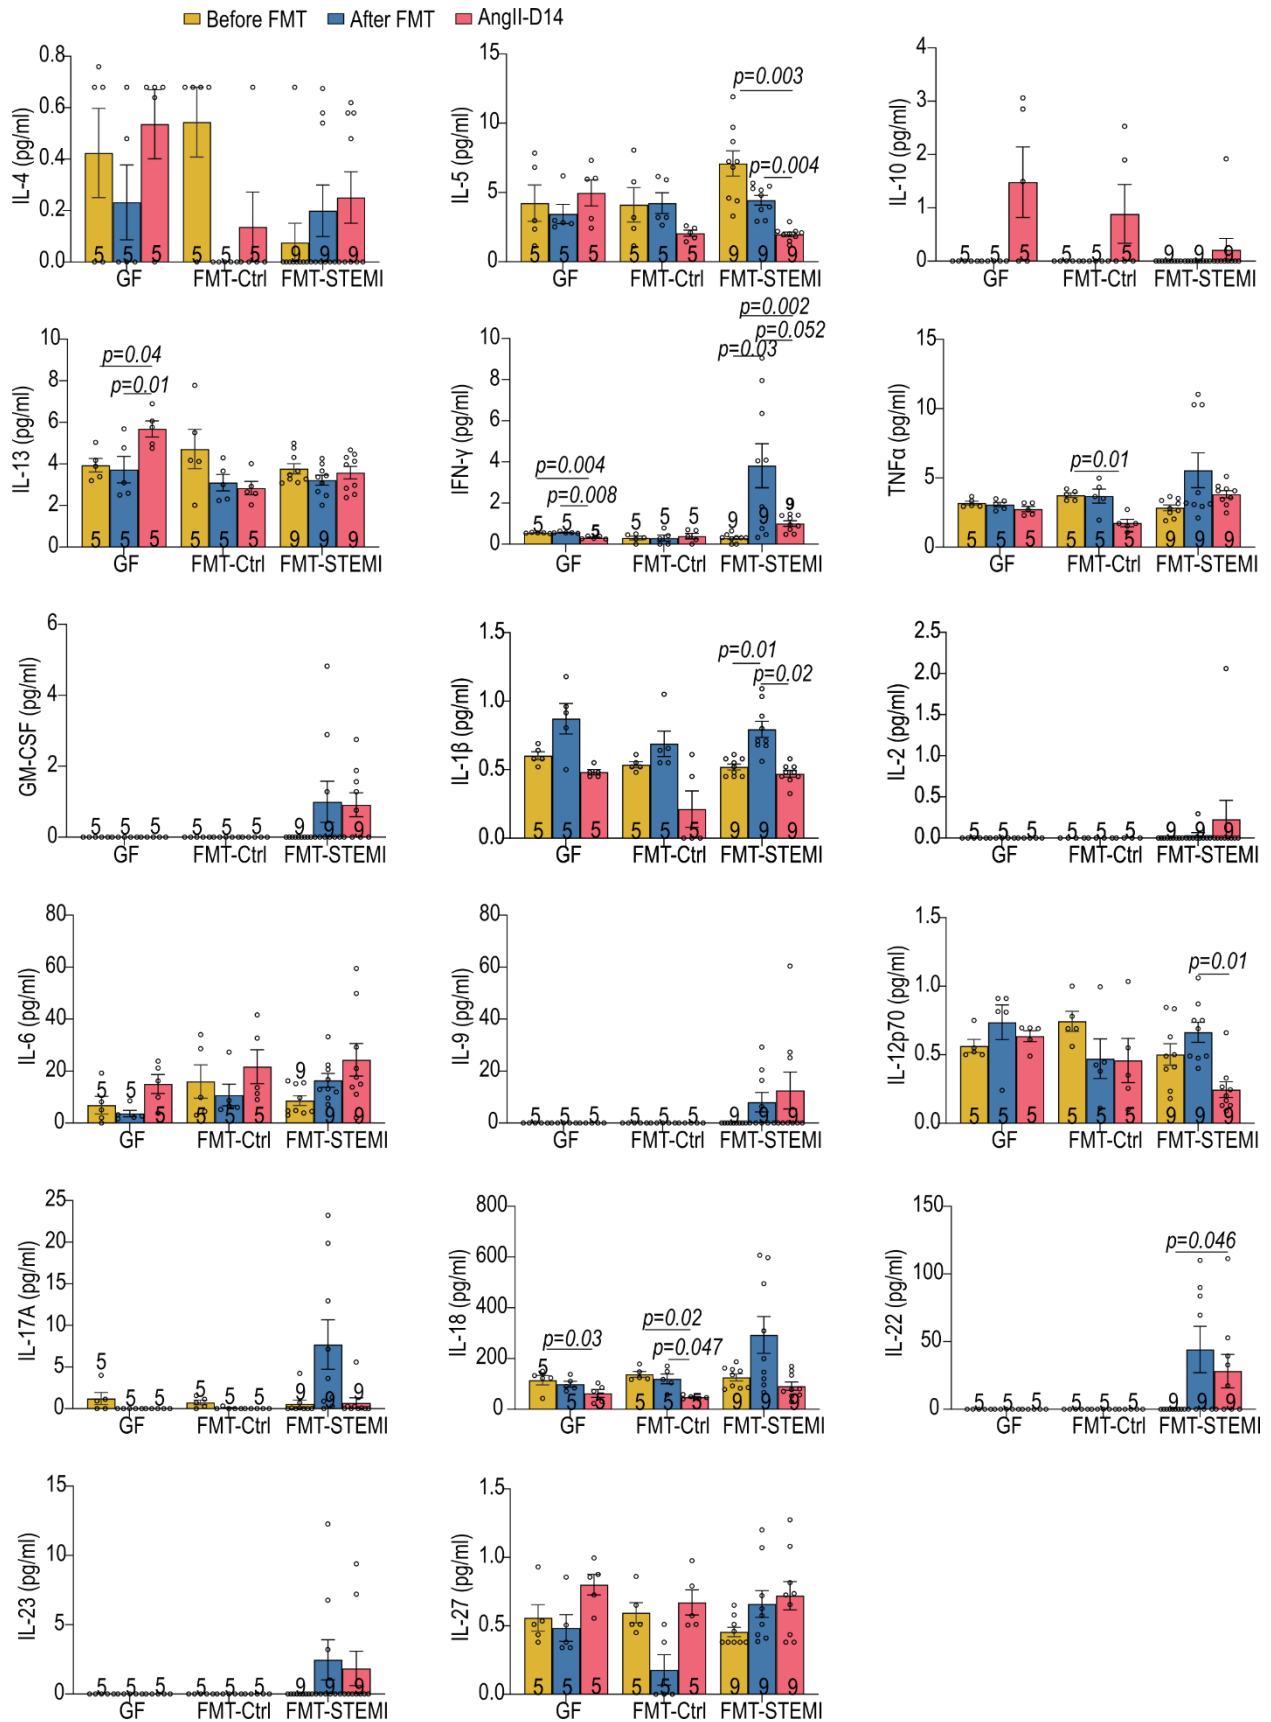

**Supplementary Figure 6. The changes of cytokines in GF-FMT mice under Angiotensin-II challenge.**

The plasma levels of cytokines in GF-FMT mice were determined using multiplex immunoassays. The number of biologically independent animals are indicated in each chart. Mixed-effects analysis followed by FDR correction was used to analyzed the data. Data are represented as mean  $\pm$  SEM. IL, interleukin; INF, interferon; TNF, tumor necrosis factor; GM-CSF, granulocyte macrophage-colony stimulating factor.

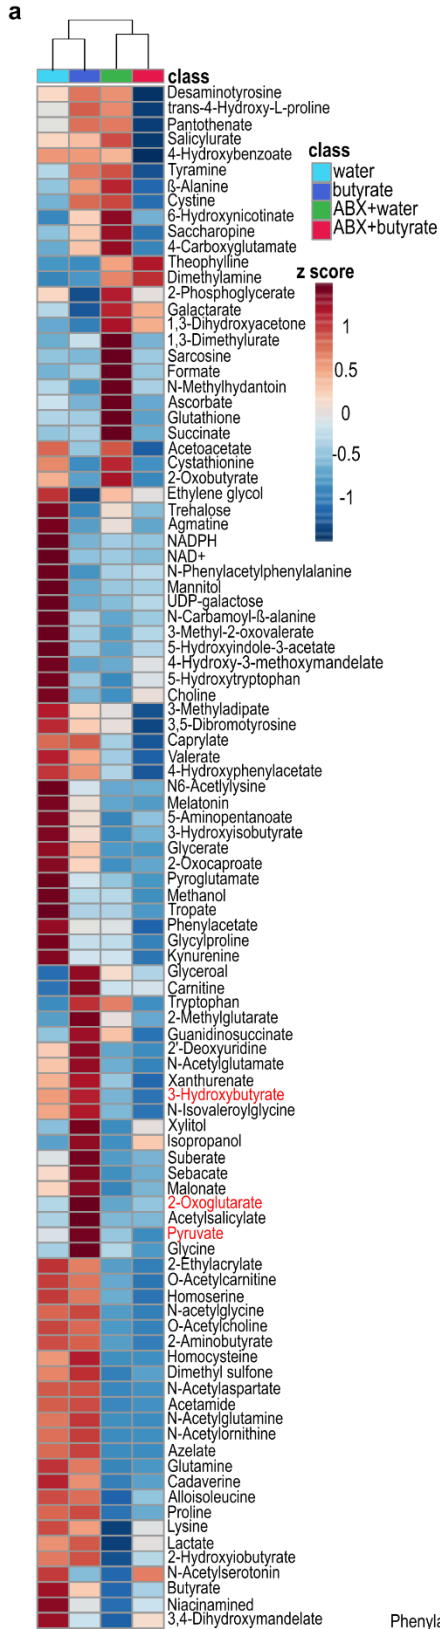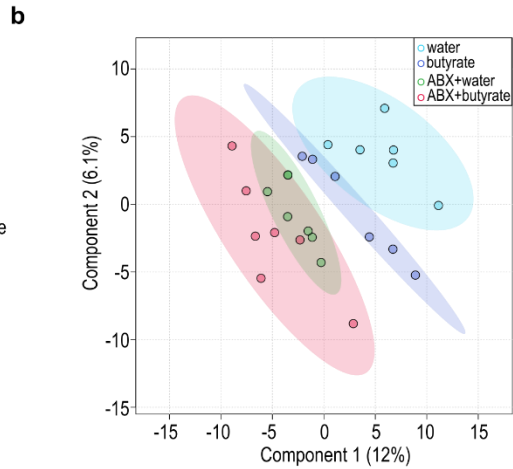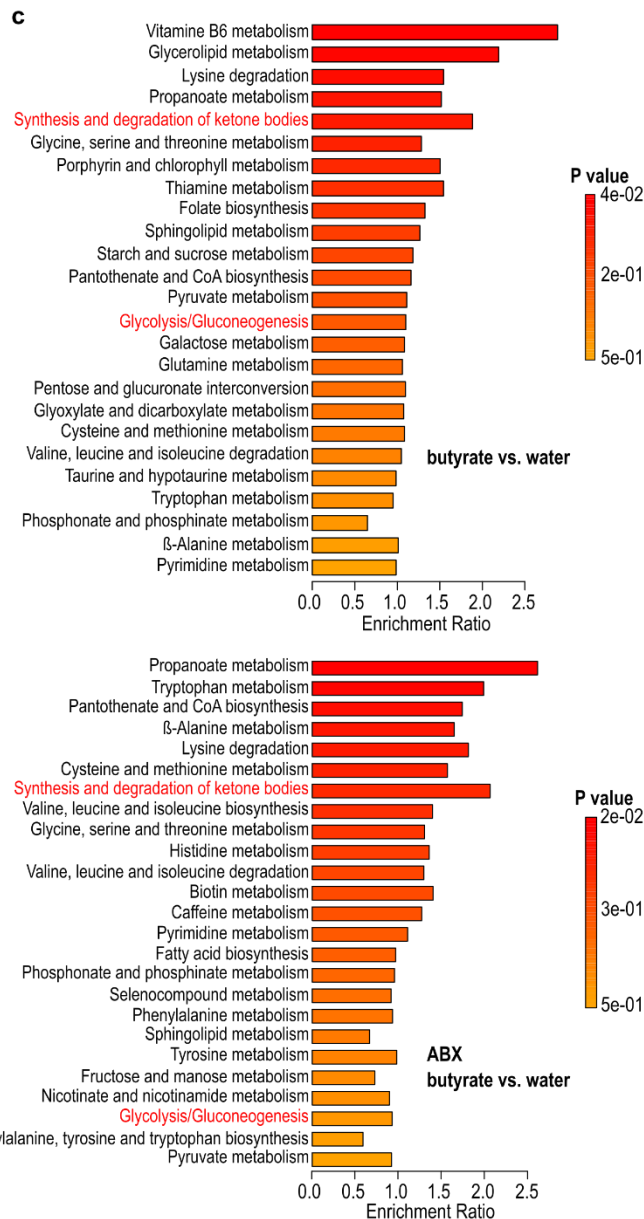



**Supplementary Figure 7. The influence of butyrate on the post-MI plasma metabolic profiling.**

(a) The heatmap of plasma metabolites of butyrate-supplemented mice. (b) The Partial Least Squares Discriminant Analysis (PLS-DA) of plasma metabolites. (c) Enrichment of metabolic pathways in butyrate-treated mice without (upper panel) and with antibiotics (lower panel).

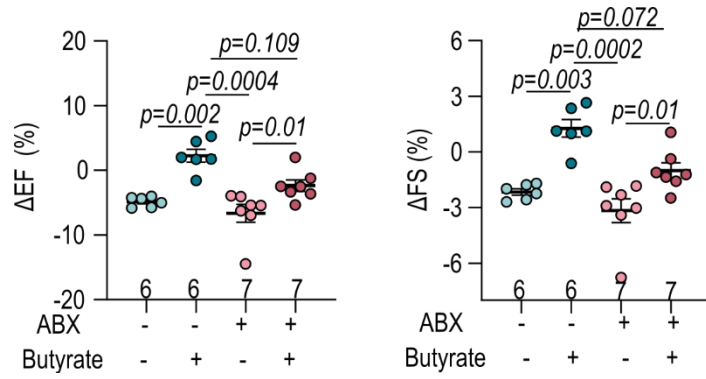

**Supplementary Figure 8. The effects of gut microbiota and butyrate on the changes of post-injury cardiac function in SPF mice.**

The changes of EF(%) and FS(%) were determined by comparing the pre-MI EF(%) and FS(%) with those on MI day 21. The number of biologically independent animals are indicated in each chart. Data were analyzed with Kruskal-Wallis test followed by FDR correction.

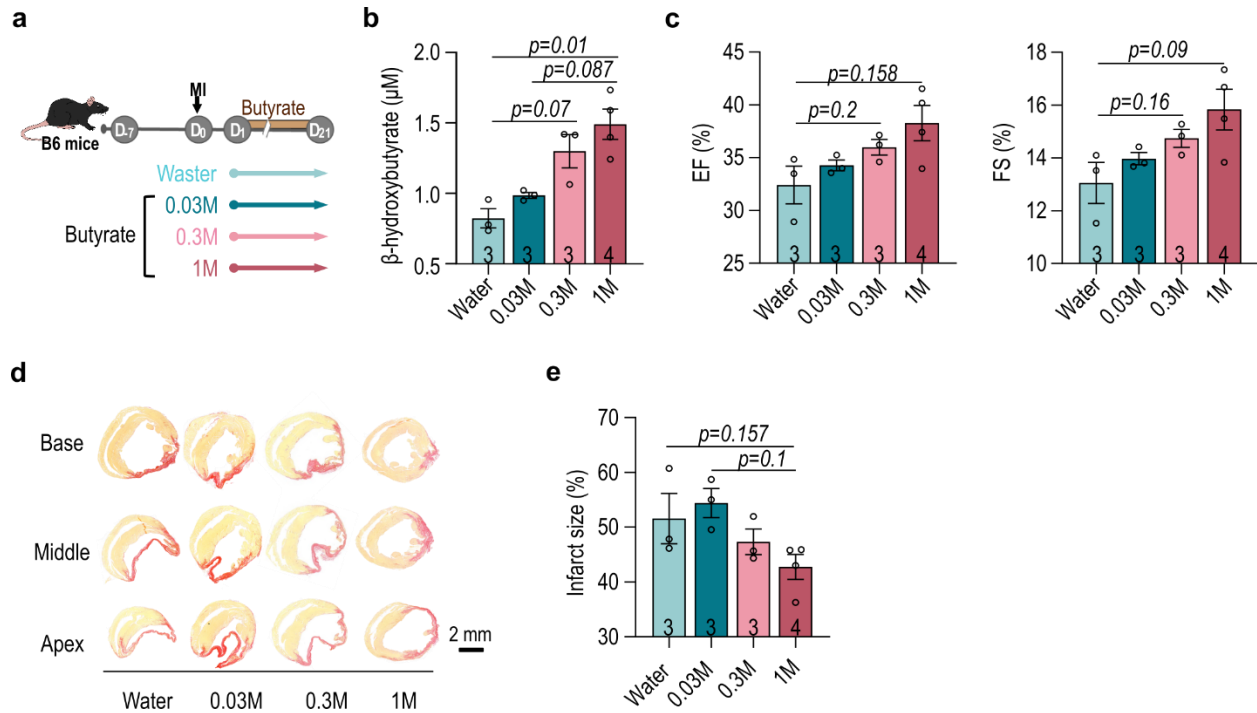

**Supplementary Figure 9. The dose-dependent cardioprotection of butyrate in SPF mice.**

(a) Schematic description of experimental design for butyrate-dose depend effect. (b) Plasma level of  $\beta$ -hydroxybutyrate determined with the colorimetric assay. (c) Left ventricular EF (%) and FS (%) of mice receiving different doses of butyrate after MI. (d) Representative images of cardiac infarct size labeled with picosirus red and (e) statistics. The number of biologically independent animals are indicated in each chart. Data were analyzed with the Kruskal-Wallis test followed by FDR correction. Data are represented as mean  $\pm$  SEM.

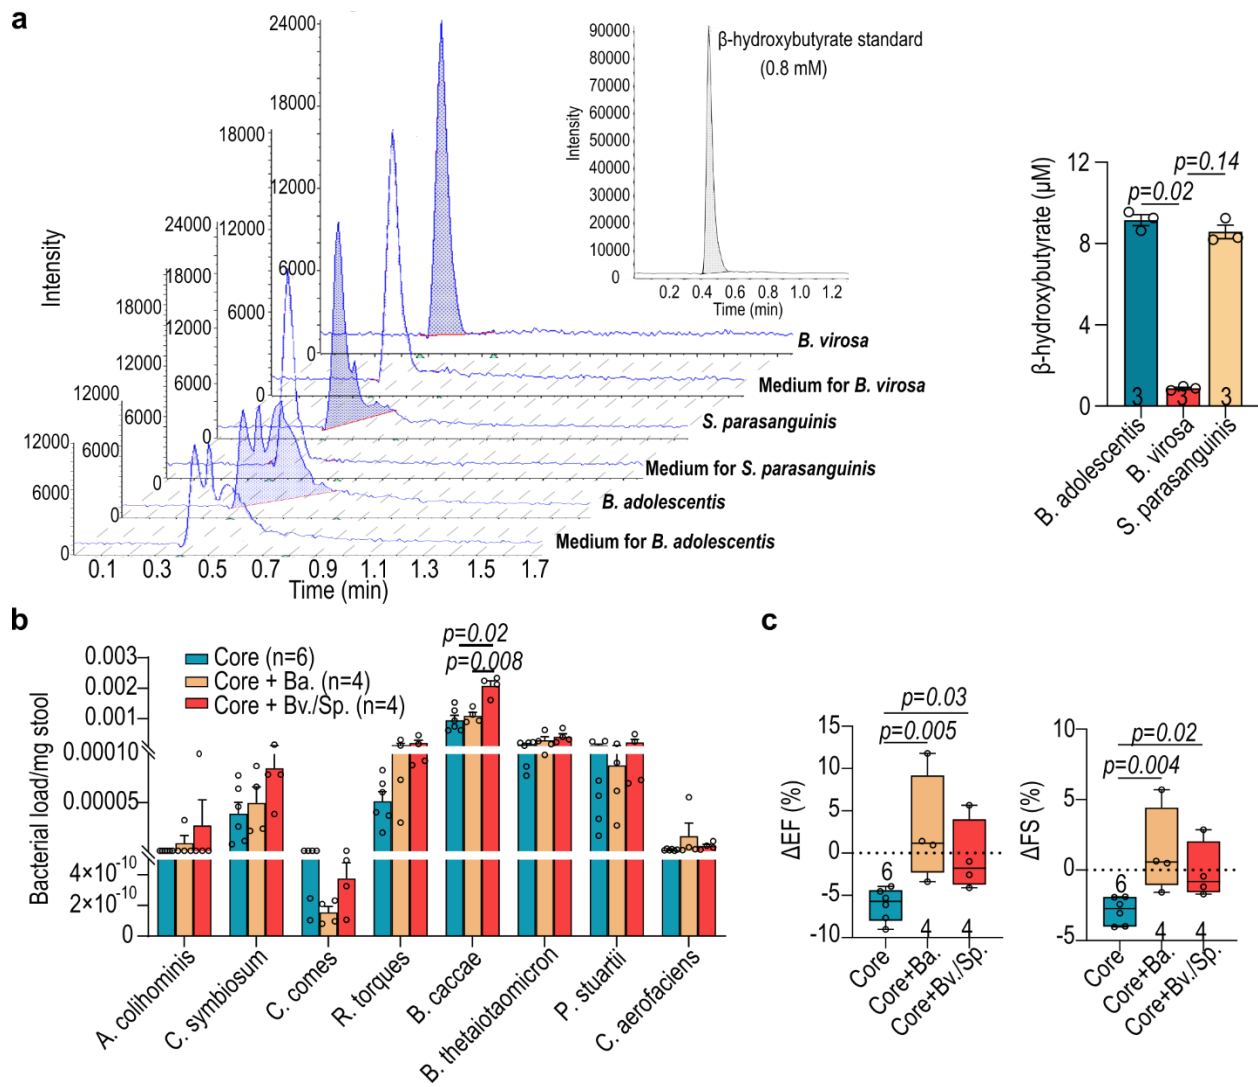

### Supplementary Figure 10. Butyrate producers produced $\beta$ -hydroxybutyrate.

(a) In vitro test of  $\beta$ -hydroxybutyrate production by *Bifidobacterium adolescentis* (*B. adolescentis*), *Butyricimonas virosa* (*B. virosa*) and *Streptococcus parasanguinis* (*S. parasanguinis*). The presence of  $\beta$ -hydroxybutyrate in the culture medium was determined with LC-MS normalized with the plain medium for each bacterium. (b) Loading of the core bacteria in the gnotobiotic mice was confirmed with qPCR (vs. Core+Bv./Sp.). (c) Echocardiographic analysis of changes in left ventricular EF (%) and FS (%) in gnotobiotic mice on MI day 21 (vs. Core). The number of biologically independent samples are indicated in each chart. Data were analyzed with the Kruskal-Wallis test followed by Dunn's correction. Data are represented as mean  $\pm$  SEM.

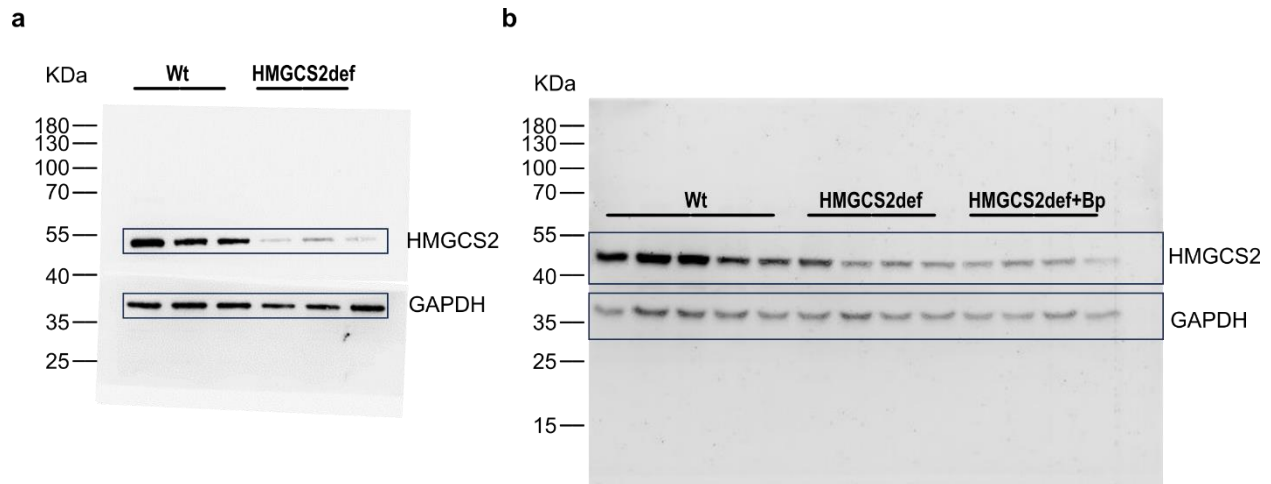

### Supplementary Figure 11. HMGCS2 Expression in the liver.

(a) The expression of HMGCS2 proteins in the liver of control (Wt) and HMGCS2def mice was determined using Western blotting. (b) The HMGCS2 protein levels in liver of Wt, HMGCS2def and HMGCS2def+Bp mice at day 14 post-MI. The whole blot was separated into two parts for HMGCS2 (upper part) and GAPDH (lower part). HMGCS2 was detected with mouse monoclonal anti-HMGCS antibody (1:200; sc-393256; SANTA CRUZ, USA). GAPDH was detected with rabbit polyclonal anti-GAPDH antibodies (1:2000; cat no. 10494-1-AP; Proteintech, USA) and used as the loading control.

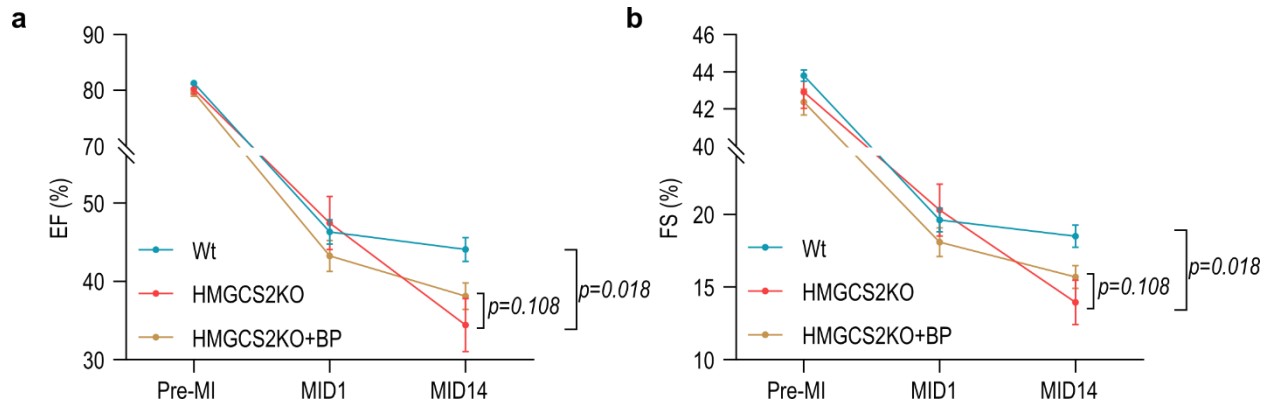

**Supplementary Figure 12. Butyrate producers showed cardioprotective function in HMGCS2def mice.**

(a) Echocardiographic analysis of the left ventricular EF (%) of HMGCS2def mice with/without butyrate producers (Bp) at pre-MI, post-MI day 1 (MID1) and post-MI day 14 (MID14). (b) Echocardiographic analysis of the left ventricular FS (%) of HMGCS2def mice at pre-MI, MID1 and MID14. Data were analyzed with the Mixed-effects analysis followed by Tukey correction and represented as mean  $\pm$  SEM.
