# Supplementary material for: Gut butyrate-producers confer post-infarction cardiac protection
Source: PubMed Central journal article supplement (PMC10636175; doi:10.1038/s41467-023-43167-5), 2023-11-09
Supplement: 41467_2023_43167_MOESM2_ESM.pdf [file 41467_2023_43167_MOESM2_ESM.pdf]

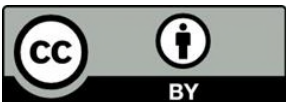

**Open Access** This file is licensed under a Creative Commons Attribution 4.0 International License, which permits use, sharing, adaptation, distribution and reproduction in any medium or format, as long as you give appropriate credit to the original author(s) and the source, provide a link to the Creative Commons license, and indicate if changes were made. In the cases where the authors are anonymous, such as is the case for the reports of anonymous peer reviewers, author attribution should be to 'Anonymous Referee' followed by a clear attribution to the source work. The images or other third party material in this file are included in the article's Creative Commons license, unless indicated otherwise in a credit line to the material. If material is not included in the article's Creative Commons license and your intended use is not permitted by statutory regulation or exceeds the permitted use, you will need to obtain permission directly from the copyright holder. To view a copy of this license, visit <http://creativecommons.org/licenses/by/4.0/>.

**Editorial Note:** This manuscript has been previously reviewed at another journal that is not operating a transparent peer review scheme. This document only contains reviewer comments and rebuttal letters for versions considered at *Nature Communications*.

## REVIEWERS' COMMENTS

Reviewer #1 (Remarks to the Author):

Chen et al. have done an overall thorough job addressing my original concerns.

A lingering major concern is that I am still not convinced about the degree to which bacteria produce beta-hydroxybutyrate (BHB). The UniProt accessions mentioned in the response are “inferred from homology” and given the weakest possible annotation score of 1/5. The colorimetric data shown in the response letter clearly shows BHB in the media controls, indicating that the assay is either cross-reacting with other compounds or the media itself contains BHB, complicating the interpretation of these data. There still is no MS2 data shown, making the mass spectrometry data preliminary.

I realize that it may not be possible to address these issues given the scope of the paper. At a minimum, additional qualifying statements should be added to the results and a more explicit text mentioning these limitations should be added to the discussion.

Furthermore, the response to my question about the HMGCS2 “KO” raised concerns. It appears that this is just a KO of exon 2 and that there is still protein produced. As such, it is more accurate to refer to this model as a knock-down and the residual BHB could still be derived from host. The authors should clarify if the residual protein is active and relabel the mouse HMGCS2 delta-exon2 or something to that effect. Together with the methodological concerns around BHB production by bacteria, the authors should temper their interpretation to acknowledge that some of what they are describing could be due to host metabolism.
